# Supplementary material
Source: Springer Nature journal article supplement (https://www.springermedizin.de/resource/supplementary/12913_2013_3036_MOESM2_ESM.pdf/9533326)
Supplement: MOESM2 [file 9533326]

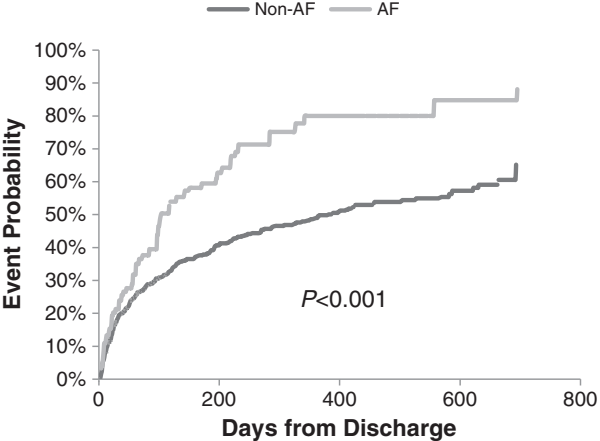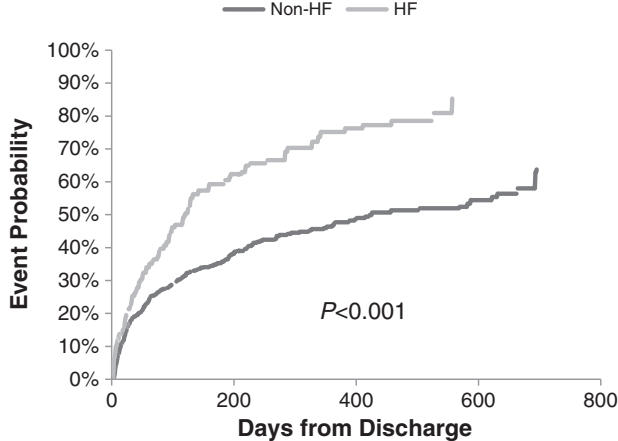

| Time                              | Index date | 1 year | 2 year |
|-----------------------------------|------------|--------|--------|
| Number of AF patients at risk     | 88         | 8      | 2      |
| Number of non-AF patients at risk | 617        | 133    | 28     |

| Time                              | Index date | 1 year | 2 year |
|-----------------------------------|------------|--------|--------|
| Number of HF patients at risk     | 167        | 17     | 3      |
| Number of non-HF patients at risk | 538        | 124    | 27     |
